# Supplementary material for: Sensory Perception and Consumer Acceptance of Carrot Cultivars Are Influenced by Their Metabolic Profiles for Volatile and Non-Volatile Organic Compounds
Source: MDPI journal article supplement (doi:10.3390/foods12244389), 2023-12-06
Supplement: s1 [file s1]

# Carrot – Sensory

**Beaker-No. ....**

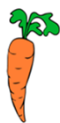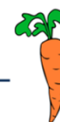

Gender: ☐ w ☐ m      Age: ..... Year      Profession: .....

Smoker: ☐ yes ☐ non      Hobby: .....

Please take of cover and eat carrot pices with the spoon.  
Prevalence assess first, afterwards the charcaters. Please tick a box.

## Acceptance

|                          |                                 |                               |             |                         |                           |                    |
|--------------------------|---------------------------------|-------------------------------|-------------|-------------------------|---------------------------|--------------------|
| 0                        | 1                               | 2                             | 3           | 4                       | 5                         | 6                  |
|                          |                                 |                               |             |                         |                           |                    |
| displeases<br>me<br>very | displeases<br>me<br>pretty much | displeases<br>me<br>something | neither nor | like<br>me<br>something | like<br>me<br>pretty much | like<br>me<br>very |

## Character

|                        |                                                                                                                                                                                                                    |            |  |        |  |         |
|------------------------|--------------------------------------------------------------------------------------------------------------------------------------------------------------------------------------------------------------------|------------|--|--------|--|---------|
| - sweet                | <input type="checkbox"/> ..... <input type="checkbox"/> | not at all |  | medium |  | intense |
| - bitter               | <input type="checkbox"/> ..... <input type="checkbox"/> | not at all |  | medium |  | intense |
| - astringent           | <input type="checkbox"/> ..... <input type="checkbox"/> | not at all |  | medium |  | intense |
| - aromatic as carrot   | <input type="checkbox"/> ..... <input type="checkbox"/> | not at all |  | medium |  | intense |
| - another aroma: ..... | <input type="checkbox"/> ..... <input type="checkbox"/> | not at all |  | medium |  | intense |

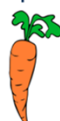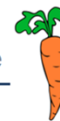

**Thank !**
