# Supplementary material for: Sensory Perception and Consumer Acceptance of Carrot Cultivars Are Influenced by Their Metabolic Profiles for Volatile and Non-Volatile Organic Compounds
Source: MDPI journal article supplement (doi:10.3390/foods12244389), 2023-12-06
Supplement: s1 [file s1]

Table S1 Carrot plant material used in the sensory study and the cultivar type, the geographic origin as well as the breeding status

| Code | Cultivar                   | Type <sup>a</sup> | Geographic origin <sup>b</sup> | Breeding status <sup>c</sup> |
|------|----------------------------|-------------------|--------------------------------|------------------------------|
| NE   | Nevis                      | Nantes            | EUR                            | F1                           |
| HG   | Himuro Fuyugosi Gosun No.2 | Kuroda            | JAP                            | OP                           |
| NL   | Nantes Liva                | Nantes            | EUR                            | OP                           |
| ST   | Stratova                   | Berlikumer        | RUS                            | OP                           |
| VA   | Vitaminaja                 | Nantes            | RUS                            | OP                           |
| RI   | Regulus Imperial           | Nantes/Flakkeer   | EUR                            | OP                           |
| HS   | Hekinan Senko 5sun         | Kuroda            | JAP                            | OP                           |
| VK   | Viking                     | Chantenay         | EUR                            | OP                           |
| NA   | Nagykallo                  | Nantes            | EUR                            | OP                           |
| NP   | Nantejska Polana           | Nantes            | EUR                            | OP                           |
| NF   | Nantes Fancy               | Nantes            | EUR                            | OP                           |
| BB   | Berlicumer Bercoro         | Berlikumer        | EUR                            | OP                           |
| BE   | Beacon                     | Nantes/Flakkeer   | EUR                            | OP                           |
| VL   | Vita Longa                 | Flakeer           | EUR                            | OP                           |
| SC   | Santa Cruz                 | Chantenay         | USA                            | OP                           |
| BR   | Brasilia                   | Flakkeer          | BRA                            | OP                           |

<sup>a</sup>Carrot root shape type, <sup>b</sup>Geographic origin of the breeders, <sup>c</sup>OP-open pollinated cultivar, F1 – hybrid cultivar
